# Supplementary material for: Abortion and euthanasia: Explanatory factors of an association in Thanatos. Analysis of the European Values Study
Source: Frontiers journal article supplement (doi:10.3389/fpos.2022.966711), 2022-10-28
Supplement: Data_Sheet_1.docx [file Data_Sheet_1.docx]

**APPENDICES**

**APPENDIX 1: SPANISH SAMPLE**

**Table A.1 Distribution of interviews throughout the country, by autonomous community and size of habitat.**

| **AUTONOMOUS COMMUNITY** | **≤ 20,000** | **20,001 – 50,000** | **50,001 – 200,000** | **200,001 – 500,000** | **≥ 500,001** | **TOTAL** |
| --- | --- | --- | --- | --- | --- | --- |
| ANDALUCÍA | 69 | 36 | 54 | 20 | 32 | 211 |
| ARAGÓN | 15 | 0 | 0 | 0 | 20 | 35 |
| ASTURIAS | 14 | 0 | 0 | 15 | 0 | 29 |
| BALEARIC ILS | 0 | 13 | 0 | 16 | 0 | 29 |
| CANARY ILS | 11 | 15 | 13 | 18 | 0 | 57 |
| CANTABRIA | 17 | 0 | 0 | 0 | 0 | 17 |
| CASTILLA - LA MANCHA | 29 | 11 | 15 | 0 | 0 | 55 |
| CASTILLA Y LEÓN | 38 | 0 | 18 | 8 | 0 | 64 |
| CATALUÑA | 58 | 31 | 39 | 23 | 44 | 195 |
| COMUNITAT VALENCIANA | 34 | 35 | 23 | 15 | 20 | 127 |
| EXTREMADURA | 17 | 0 | 11 | 0 | 0 | 28 |
| GALICIA | 37 | 11 | 12 | 14 | 0 | 74 |
| MADRID | 15 | 9 | 48 | 10 | 87 | 169 |
| MURCIA | 14 | 11 | 0 | 16 | 0 | 41 |
| NAVARRA | 17 | 0 | 0 | 0 | 0 | 17 |
| BASQUE COUNTRY | 20 | 10 | 11 | 16 | 0 | 57 |
| LA RIOJA | 0 | 0 | 7 | 0 | 0 | 7 |
| **Total** | **405** | **182** | **251** | **171** | **203** | **1,212** |

**APPENDIX II**

**Table A-2** Justification of euthanasia and abortion. Averages by country.

| Country Code (ISO 3166-1 numeric code) | Average  Euthanasia | Average  Abortion |
| --- | --- | --- |
| Netherlands | 7.47 | 7.10 |
| Germany | 7.37 | 6.13 |
| Denmark | 7.34 | 8.39 |
| Finland | 6.90 | 6.90 |
| France | 6.90 | 7.03 |
| Sweden | 6.65 | 8.29 |
| Iceland | 6.63 | 7.30 |
| Great Britain | 6.61 | 6.27 |
| Slovenia | 6.36 | 6.63 |
| Norway | 6.31 | 7.61 |
| Czech Republic | 6.24 | 6.15 |
| Switzerland | 6.19 | 6.35 |
| Spain | 5.99 | 5.94 |
| Estonia | 5.98 | 5.53 |
| Austria | 5.98 | 5.79 |
| Italy | 5.88 | 5.27 |
| Lithuania | 5.20 | 4.82 |
| Belarus | 4.99 | 4.17 |
| Russia | 4.99 | 4.75 |
| Hungary | 4.93 | 5.04 |
| Slovakia | 4.68 | 5.12 |
| Croatia | 4.58 | 4.53 |
| Portugal | 4.53 | 4.29 |
| Poland | 4.22 | 3.74 |
| Serbia | 4.02 | 3.99 |
| Bulgaria | 3.76 | 4.96 |
| Bosnia and Herzegovina | 3.65 | 3.51 |
| Montenegro | 3.16 | 2.85 |
| Romania | 3.08 | 3.52 |
| North Macedonia | 3.00 | 4.36 |
| Armenia | 2.77 | 2.51 |
| Albania | 2.66 | 2.94 |
| Azerbaijan | 2.30 | 3.66 |
| Total | 5.30 | 5.36 |

Source: Authors’ construction based on data from the European Values Study

| **APPENDIX III: FACTORIAL ANALYSIS/SPAIN**  **Table A.3. Justification of behaviors. Factorial analysis in Spain. Rotated component matrixa** | | | | |
| --- | --- | --- | --- | --- |
|  | Component | | | |
| 1 | 2 | 3 | 4 |
| do you justify: divorce (Q44G) | 0.871 | -0.001 | -0.116 | -0.081 |
| do you justify: homosexuality (Q44E) | 0.836 | 0.089 | 0.037 | 0.126 |
| do you justify: abortion (Q44F) | 0.804 | 0.209 | 0.134 | -0.096 |
| do you justify: artificial insemination or in-vitro fertilization (Q44M) | 0.792 | -0.022 | -0.269 | 0.017 |
| do you justify: having casual sex (Q44J) | 0.756 | 0.311 | -0.094 | 0.061 |
| do you justify: euthanasia (Q44H) | 0.749 | 0.177 | -0.055 | 0.139 |
| do you justify: prostitution (Q44L) | 0.218 | 0.828 | -0.059 | 0.089 |
| do you justify: taking soft drugs (Q44C) | 0.349 | 0.637 | 0.309 | 0.019 |
| do you justify: avoiding a fare on public transport (Q44K) | 0.036 | 0.584 | 0.225 | 0.345 |
| do you justify: suicide (Q44I) | 0.253 | 0.563 | 0.277 | 0.235 |
| do you justify: claiming state benefits (Q44A) | -0.027 | 0.012 | 0.883 | 0.032 |
| do you justify: cheating on tax (Q44B) | -0.207 | 0.395 | 0.700 | 0.276 |
| do you justify: accepting a bribe (Q44D) | -0.281 | 0.421 | 0.632 | 0.346 |
| do you justify: death penalty (Q44O) | 0.039 | 0.190 | 0.125 | 0.904 |
| do you justify: political violence (Q44N) | -0.208 | 0.400 | 0.450 | 0.568 |
| Extraction method: analysis of principal components.  Rotation method: Varimax with Kaiser normalization. | | | | |
| a. The rotation has coincided in 6 iterations. 70.22% of the total variance explained. | | | | |
